# Supplementary material for: Impact of DRG Payment Reform on Patients Undergoing Orthopedic Internal Fixation Surgery
Source: Research Square preprint supplement (doi:10.21203/rs.3.rs-7974147/v1), 2025-12-02
Supplement: Supplementary file 1 [file b2d48a8eea59c5522123ae6f.docx]

**Supplementary Table 1. The impact of different age groups on total inpatient expenses and length of stay before and after the DRG payment reform**

| **Evaluation index** | **Category** | | **Before DRG payment reform** | | **After DRG payment reform** | | **Change rate (%)** | | **t** | | **P** | |
| --- | --- | --- | --- | --- | --- | --- | --- | --- | --- | --- | --- | --- |
| **Age (total inpatient expenses/Yuan)** | | <50 years old | | 24972.58±  33241.43 | | 24888.28±  15889.07 | | -0.34 | | 0.03 | | 0.976 | |
|  | | 50–59 years old | | 34055.90±  27575.69 | | 26136.00±  16796.95 | | -23.25 | | 2.382 | | 0.018 | |
|  | | ≥60 years old | | 39292.07±  23428.65 | | 31621.82±  18553.33 | | -19.52 | | 2.444 | | 0.015 | |
| **Age (length of stay/days)** | | <50 years old | | 10.94±6.75 | | 9.98±6.54 | | -8.78 | | 1.348 | | 0.179 | |
|  | | 50–59 years old | | 14.97±10.48 | | 11.04±7.36 | | -26.25 | | 2.971 | | 0.003 | |
|  | ≥60 years old | | 15.83±7.64 | | 12.10±7.03 | | -23.56 | | 3.351 | | 0.001 | |

**Supplementary Table 2. The impact of different surgical sites on total inpatient expenses and length of stay before and after the DRG payment reform**

| **Evaluation index** | **Category** | **Before DRG payment reform** | **After DRG payment reform** | **Change rate (%)** | **t** | **P** |
| --- | --- | --- | --- | --- | --- | --- |
| **Surgical site (total inpatient expenses/Yuan)** | Grade II Group | 9576.42±  2349.97 | 16298.93±  4810.44 | 70.2 | -3.608 | 0.002 |
|  | Grade III Group | 24731.61±  16567.24 | 25606.63±  15755.53 | 3.54 | -0.643 | 0.521 |
|  | Grade IV Group | 49207.37±  27796.49 | 31440.19±  19420.86 | -36.11 | 4.001 | 0 |
| **Surgical site (length of stay/days)** | Grade II Group | 6.25±2.31 | 11.30±9.90 | 80.8 | -1.404 | 0.577 |
|  | Grade III Group | 12.19±7.62 | 10.23±6.45 | -16.08 | 3.287 | 0.001 |
|  | Grade IV Group | 17.44±8.82 | 12.69±7.97 | -27.24 | 3.055 | 0.003 |
